# Supplementary material
Source: HighWire-hosted journal article supplement (https://bjgp.org/highwire/filestream/44536/field_highwire_adjunct_files/0/BJGP.2022.0103_suppl.pdf)
Supplement: BJGP.2022.0103_suppl.pdf [file BJGP.2022.0103_suppl.pdf]

**Figure S1.** Bar chart showing change in treatment burden by participant baseline characteristics.

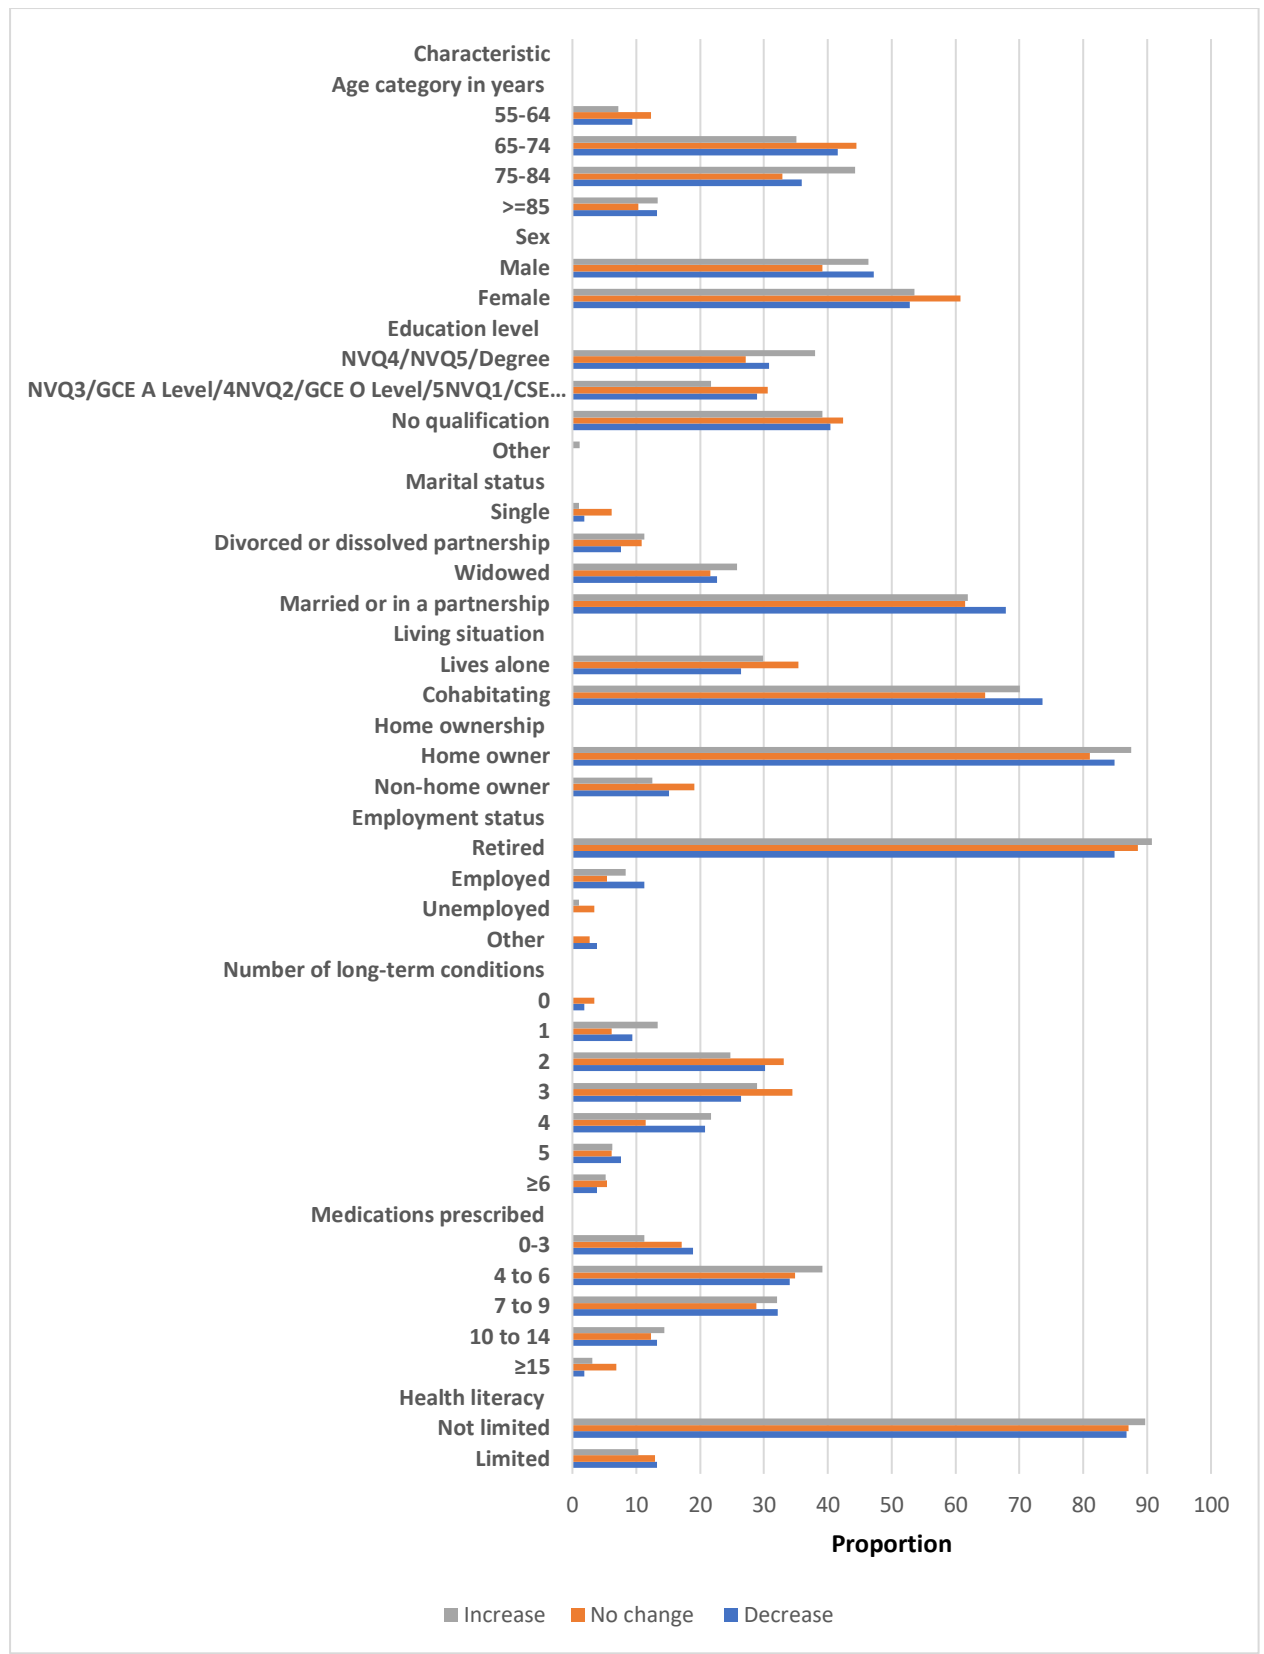

Figure shows proportion of patients with each characteristic in each treatment burden category change

**Table S1. Baseline characteristics of invited sample**

| Characteristic                        | Invited sample<br>(n=388)         |          |
|---------------------------------------|-----------------------------------|----------|
|                                       | Number<br>*                       | % of N   |
| <b>Age in years, mean(SD)</b>         | 74.6 (8.2)                        |          |
| <b>Age category in years</b>          |                                   |          |
|                                       | 55 to 59                          | 19 4.9   |
|                                       | 60 to 64                          | 24 6.1   |
|                                       | 65 to 69                          | 59 15.1  |
|                                       | 70 to 74                          | 96 24.6  |
|                                       | 75 to 79                          | 85 21.7  |
|                                       | 80 to 84                          | 57 14.6  |
|                                       | 85 to 89                          | 39 10.0  |
|                                       | 90 to 94                          | 11 2.8   |
|                                       | >=95                              | 1 0.3    |
| <b>Sex</b>                            |                                   |          |
|                                       | Male                              | 176 44.8 |
|                                       | Female                            | 217 55.2 |
| <b>Ethnicity</b>                      |                                   |          |
|                                       | White                             | 391 99.7 |
|                                       | Other than White                  | 1 0.3    |
| <b>Marital status</b>                 |                                   |          |
|                                       | Married or in a partnership       | 248 63.3 |
|                                       | Widowed                           | 86 21.9  |
|                                       | Divorced or dissolved partnership | 43 11.0  |
|                                       | Single                            | 15 3.8   |
| <b>Living situation</b>               |                                   |          |
|                                       | Cohabiting                        | 267 68.1 |
|                                       | Lives alone                       | 125 31.9 |
| <b>Home ownership</b>                 |                                   |          |
|                                       | Homeowner                         | 320 81.8 |
|                                       | Non-homeowner                     | 71 18.2  |
| <b>Employment status</b>              |                                   |          |
|                                       | Retired                           | 348 88.6 |
|                                       | Employed                          | 30 7.6   |
|                                       | Unemployed                        | 7 1.8    |
|                                       | Other                             | 8 2.0    |
| <b>Smoking status</b>                 |                                   |          |
|                                       | Current smoker                    | 19 4.8   |
|                                       | Ex-smoker                         | 214 54.5 |
|                                       | Never smoked                      | 160 40.7 |
| <b>Number of long-term conditions</b> |                                   |          |
|                                       | 0                                 | 7 1.8    |

|                                                           |                      |     |      |
|-----------------------------------------------------------|----------------------|-----|------|
|                                                           | 1                    | 39  | 9.9  |
|                                                           | 2                    | 108 | 27.4 |
|                                                           | 3                    | 114 | 28.9 |
|                                                           | 4                    | 80  | 20.3 |
|                                                           | 5                    | 28  | 7.1  |
|                                                           | ≥6                   | 18  | 4.6  |
| <b>Medications prescribed</b>                             |                      |     |      |
|                                                           | 0 to 3               | 58  | 14.8 |
|                                                           | 4 to 6               | 139 | 35.6 |
|                                                           | 7 to 9               | 115 | 29.4 |
|                                                           | 10 to 14             | 55  | 14.1 |
|                                                           | ≥15                  | 24  | 6.1  |
| <b>Treatment burden category</b>                          |                      |     |      |
|                                                           | High                 | 67  | 17.0 |
|                                                           | Medium               | 115 | 29.2 |
|                                                           | Low                  | 110 | 27.9 |
|                                                           | None                 | 102 | 25.9 |
| <b>Health literacy</b>                                    |                      |     |      |
|                                                           | Never                | 265 | 67.4 |
|                                                           | Rarely               | 66  | 16.8 |
|                                                           | Sometimes            | 34  | 8.7  |
|                                                           | Often                | 19  | 4.8  |
|                                                           | Always               | 9   | 2.3  |
| <b>Financial difficulty with healthcare</b>               |                      |     |      |
|                                                           | Not difficult or n/a | 303 | 77.7 |
|                                                           | A little             | 57  | 14.6 |
|                                                           | Quite                | 18  | 4.6  |
|                                                           | Very                 | 11  | 2.8  |
|                                                           | Extreme              | 1   | 0.3  |
| <b>Travel time to hospital</b>                            |                      |     |      |
|                                                           | ≤ 1 hour             | 334 | 92.5 |
|                                                           | >1 hour              | 27  | 7.5  |
| <b>Travel time to GP</b>                                  |                      |     |      |
|                                                           | ≤10 minutes          | 240 | 61.7 |
|                                                           | >10 minutes          | 149 | 38.3 |
| <b>Number of outpatient appointments in last 6 months</b> |                      |     |      |
|                                                           | 0-2                  | 290 | 81.2 |
|                                                           | ≥3                   | 67  | 18.8 |

\*Please note - the total numbers in this table do not equate to 388 (the number of the final invited sample) as there were six people from one practice who were deemed initially eligible and then became ineligible by the point of survey mail out. The practice were subsequently unable to clearly distinguish these individuals from the rest of the invited sample and their data has therefore not been removed from this descriptive table. This represents an administrative issue only, regarding data availability on the invited sample. Only patients who were eligible to receive the survey were included in the actual mail-out.

**Table S2. Baseline characteristics of those who experienced a change in treatment burden category and those who did not**

| Characteristic                                           | No change in treatment burden category (n=149) |        | Increase in treatment burden category (n=98) |        | Decrease in treatment burden category (n=53) |        | p-value |
|----------------------------------------------------------|------------------------------------------------|--------|----------------------------------------------|--------|----------------------------------------------|--------|---------|
|                                                          | Number                                         | % of N | Number                                       | % of N | Number                                       | % of N |         |
| <b>Age in years, mean (SD)</b>                           | 73.1 (8.0)                                     |        | 76.1 (7.6)                                   |        | 74.8 (8.4)                                   |        | 0.755   |
| <b>Age category in years</b>                             |                                                |        |                                              |        |                                              |        |         |
| 55 to 64                                                 | 20                                             | 13.5   | 7                                            | 7.1    | 5                                            | 9.4    |         |
| 65 to 74                                                 | 65                                             | 43.9   | 35                                           | 35.7   | 22                                           | 41.5   |         |
| 75 to 84                                                 | 48                                             | 32.4   | 43                                           | 43.9   | 19                                           | 35.9   |         |
| ≥85                                                      | 15                                             | 10.1   | 13                                           | 13.3   | 7                                            | 13.2   | 0.418   |
| <b>Sex</b>                                               |                                                |        |                                              |        |                                              |        |         |
| Male                                                     | 58                                             | 38.90  | 46                                           | 46.9   | 25                                           | 47.2   |         |
| Female                                                   | 91                                             | 61.1   | 52                                           | 53.1   | 28                                           | 52.8   | 0.342   |
| <b>Education</b>                                         |                                                |        |                                              |        |                                              |        |         |
| NVQ4/NVQ5/Degree                                         | 44                                             | 30.1   | 21                                           | 22.6   | 15                                           | 28.9   |         |
| NVQ3/GCE A Level/4NVQ2/GCE O Level/5NVQ1/CSE other grade | 41                                             | 28.1   | 35                                           | 37.6   | 16                                           | 30.8   |         |
| No qualification                                         | 61                                             | 41.8   | 36                                           | 38.7   | 21                                           | 40.4   |         |
| Other                                                    | 0                                              | 0.0    | 1                                            | 1.1    | 0                                            | 0.0    | 0.526   |
| <b>Ethnicity</b>                                         |                                                |        |                                              |        |                                              |        |         |
| White                                                    | 149                                            | 100.0  | 97                                           | 99.0   | 52                                           | 98.1   |         |
| Other than White                                         | 0                                              | 0.0    | 0                                            | 0.0    | 1                                            | 1.9    | 0.097   |
| <b>Marital status</b>                                    |                                                |        |                                              |        |                                              |        |         |
| Married or in a partnership                              | 93                                             | 62.0   | 61                                           | 62.2   | 36                                           | 67.9   |         |
| Widowed                                                  | 32                                             | 21.3   | 25                                           | 25.5   | 12                                           | 22.6   |         |
| Divorced or dissolved partnership                        | 16                                             | 10.7   | 11                                           | 11.2   | 4                                            | 7.6    |         |
| Single                                                   | 9                                              | 6.0    | 1                                            | 1.0    | 1                                            | 1.9    | 0.452   |
| <b>Living situation</b>                                  |                                                |        |                                              |        |                                              |        |         |
| Cohabiting                                               | 97                                             | 65.1   | 69                                           | 70.4   | 39                                           | 73.6   |         |
| Lives alone                                              | 52                                             | 34.9   | 29                                           | 29.6   | 14                                           | 26.4   | 0.221   |
| <b>Home ownership</b>                                    |                                                |        |                                              |        |                                              |        |         |
| Homeowner                                                | 121                                            | 81.2   | 85                                           | 87.6   | 45                                           | 84.9   |         |
| Non-homeowner                                            | 28                                             | 18.8   | 12                                           | 12.4   | 8                                            | 15.1   | 0.398   |
| <b>Employment status</b>                                 |                                                |        |                                              |        |                                              |        |         |
| Retired                                                  | 131                                            | 87.9   | 89                                           | 90.8   | 45                                           | 84.9   |         |
| Employed                                                 | 9                                              | 6.0    | 8                                            | 8.2    | 6                                            | 11.3   |         |
| Unemployed                                               | 5                                              | 3.4    | 1                                            | 1.0    | 2                                            | 3.8    | 0.300   |
| Other                                                    | 4                                              | 2.7    |                                              |        |                                              |        |         |
| <b>Smoking status</b>                                    |                                                |        |                                              |        |                                              |        |         |
| Current smoker                                           | 8                                              | 5.4    | 4                                            | 4.1    | 1                                            | 1.9    |         |
| Ex-smoker                                                | 71                                             | 44.6   | 54                                           | 55.1   | 28                                           | 52.8   |         |

|                                                           |     |      |    |      |    |      |        |
|-----------------------------------------------------------|-----|------|----|------|----|------|--------|
| Never smoked                                              | 70  | 47.0 | 40 | 40.8 | 24 | 45.3 | 0.703  |
| <b>Number of long-term conditions</b>                     |     |      |    |      |    |      |        |
| 0                                                         | 5   | 3.3  |    |      | 1  | 1.9  |        |
| 1                                                         | 9   | 6.0  | 13 | 13.3 | 5  | 9.4  |        |
| 2                                                         | 49  | 32.7 | 24 | 24.5 | 16 | 30.2 |        |
| 3                                                         | 51  | 34.0 | 29 | 29.6 | 14 | 26.4 |        |
| 4                                                         | 19  | 12.7 | 21 | 21.4 | 11 | 20.8 |        |
| 5                                                         | 9   | 6.0  | 6  | 6.1  | 4  | 7.6  |        |
| ≥6                                                        | 8   | 5.3  | 5  | 5.1  | 2  | 3.8  | 0.483  |
| <b>Medications prescribed</b>                             |     |      |    |      |    |      |        |
| 0 to 3                                                    | 25  | 16.8 | 11 | 11.2 | 10 | 18.9 |        |
| 4 to 6                                                    | 52  | 34.8 | 39 | 39.8 | 18 | 34.0 |        |
| 7 to 9                                                    | 42  | 28.2 | 31 | 31.6 | 17 | 32.1 |        |
| 10 to 14                                                  | 19  | 12.8 | 14 | 14.3 | 7  | 13.2 |        |
| ≥15                                                       | 10  | 6.7  | 3  | 3.1  | 1  | 1.9  | 0.705  |
| <b>Treatment burden category</b>                          |     |      |    |      |    |      |        |
| High                                                      | 35  | 23.5 | 0  | 0.0  | 11 | 20.8 |        |
| Medium                                                    | 39  | 26.1 | 22 | 22.5 | 23 | 43.4 |        |
| Low                                                       | 32  | 21.4 | 35 | 35.7 | 19 | 35.9 |        |
| None                                                      | 43  | 28.9 | 41 | 41.8 | 0  | 0.0  | <0.001 |
| <b>Health literacy</b>                                    |     |      |    |      |    |      |        |
| Never                                                     | 101 | 68.2 | 70 | 71.4 | 39 | 73.6 |        |
| Rarely                                                    | 28  | 18.9 | 18 | 18.4 | 7  | 13.2 |        |
| Sometimes                                                 | 11  | 7.4  | 9  | 9.2  | 3  | 5.7  |        |
| Often                                                     | 4   | 2.7  | 1  | 1.0  | 3  | 5.7  |        |
| Always                                                    | 4   | 2.7  | 0  | 0.0  | 1  | 1.9  | 0.554  |
| <b>Financial difficulty with healthcare</b>               |     |      |    |      |    |      |        |
| Not difficult or n/a                                      | 117 | 80.1 | 77 | 78.6 | 42 | 79.3 |        |
| A little                                                  | 19  | 13.0 | 17 | 17.4 | 8  | 15.1 |        |
| Quite                                                     | 4   | 2.7  | 3  | 3.1  | 3  | 5.7  |        |
| Very                                                      | 6   | 4.1  | 1  | 1.0  | 0  | 0.0  | 0.457  |
| <b>Travel time to hospital</b>                            |     |      |    |      |    |      |        |
| ≤ 1 hour                                                  | 128 | 92.8 | 84 | 95.5 | 49 | 96.1 |        |
| >1 hour                                                   | 10  | 7.2  | 4  | 4.6  | 2  | 3.9  | 0.573  |
| <b>Travel time to GP</b>                                  |     |      |    |      |    |      |        |
| ≤10 minutes                                               | 88  | 59.9 | 61 | 62.9 | 38 | 71.7 |        |
| >10 minutes                                               | 59  | 40.1 | 36 | 37.1 | 15 | 28.3 | 0.310  |
| <b>Number of outpatient appointments in last 6 months</b> |     |      |    |      |    |      |        |
| 0 to 2                                                    | 110 | 80.9 | 79 | 86.8 | 37 | 80.4 |        |
| ≥3                                                        | 26  | 19.1 | 12 | 13.2 | 9  | 19.6 | 0.458  |
| <b>Number of GP appointments in last 6 months</b>         |     |      |    |      |    |      |        |
| 0 to 2                                                    | 91  | 67.9 | 60 | 69.0 | 26 | 56.5 |        |
| ≥3                                                        | 43  | 32.1 | 27 | 31.0 | 20 | 43.5 | 0.301  |

**Table S3. Associations with increase and decrease in treatment burden category**

| Characteristic                          | Increase    |           |      |         | Decrease    |        |         |       |
|-----------------------------------------|-------------|-----------|------|---------|-------------|--------|---------|-------|
|                                         | Univariable |           |      | p-value | Univariable |        |         |       |
|                                         | OR          | 95% CI    |      |         | OR          | 95% CI | p-value |       |
| <b>Age category in years</b>            |             |           |      |         |             |        |         |       |
| 65 to 74                                | 1.44        | 0.57      | 3.62 | 0.443   | 1.19        | 0.41   | 3.43    | 0.750 |
| 75 to 84                                | 2.29        | 0.91      | 5.76 | 0.078   | 1.13        | 0.38   | 3.30    | 0.827 |
| >=85                                    | 2.11        | 0.71      | 6.23 | 0.176   | 1.35        | 0.38   | 4.78    | 0.642 |
| <b>Sex (vs male)</b>                    |             |           |      |         |             |        |         |       |
| Female                                  | 0.78        | 0.48      | 1.27 | 0.321   | 0.81        | 0.45   | 1.47    | 0.485 |
| <b>Marital status (vs married)</b>      |             |           |      |         |             |        |         |       |
| Single                                  | 0.21        | 0.03      | 1.43 | 0.143   | 0.43        | 0.05   | 3.45    | 0.425 |
| Divorced or dissolved partnership       | 1.16        | 0.52      | 2.58 | 0.710   | 0.63        | 0.21   | 1.92    | 0.421 |
| Widowed                                 | 1.20        | 0.67      | 2.14 | 0.533   | 0.90        | 0.44   | 1.85    | 0.776 |
| <b>Living situation (vs cohabiting)</b> |             |           |      |         |             |        |         |       |
| Lives alone                             | 0.87        | 0.51      | 1.46 | 0.591   | 0.74        | 0.38   | 1.43    | 0.366 |
| <b>Home ownership (vs homeowner)</b>    |             |           |      |         |             |        |         |       |
| Non-homeowner                           | 0.65        | 0.32      | 1.32 | 0.232   | 0.92        | 0.40   | 2.09    | 0.834 |
| <b>Employment status</b>                |             |           |      |         |             |        |         |       |
| Unemployed                              | 0.40        | 0.04      | 4.02 | 0.437   |             |        |         |       |
| Retired                                 | 1.01        | 0.42      | 2.45 | 0.980   | 0.61        | 0.23   | 1.63    | 0.328 |
| Other                                   |             | (omitted) |      |         | 1.50        | 0.22   | 10.36   | 0.681 |
| <b>Smoking status (vs never smoked)</b> |             |           |      |         |             |        |         |       |
| Ex-smoker                               | 1.27        | 0.77      | 2.08 | 0.347   | 1.02        | 0.56   | 1.86    | 0.952 |
| Current smoker                          | 1.04        | 0.30      | 3.59 | 0.945   | 0.38        | 0.05   | 3.08    | 0.366 |

**Number of long-term conditions (vs 0 or 1 condition)**

|    |      |      |      |       |      |      |      |       |
|----|------|------|------|-------|------|------|------|-------|
| 2  | 0.57 | 0.25 | 1.32 | 0.187 | 0.99 | 0.35 | 2.78 | 0.979 |
| 3  | 0.69 | 0.30 | 1.56 | 0.371 | 0.79 | 0.28 | 2.25 | 0.656 |
| 4  | 1.08 | 0.44 | 2.63 | 0.871 | 1.23 | 0.41 | 3.75 | 0.706 |
| 5  | 0.71 | 0.22 | 2.34 | 0.574 | 1.20 | 0.29 | 4.93 | 0.800 |
| ≥6 | 0.77 | 0.21 | 2.77 | 0.688 | 0.69 | 0.12 | 3.91 | 0.677 |

**Medications prescribed (vs <7)**

|    |      |      |      |       |      |      |      |       |
|----|------|------|------|-------|------|------|------|-------|
| ≥7 | 1.03 | 0.63 | 1.67 | 0.907 | 0.94 | 0.52 | 1.70 | 0.831 |
|----|------|------|------|-------|------|------|------|-------|

**Health literacy (vs not limited)**

|         |      |      |      |       |      |      |      |       |
|---------|------|------|------|-------|------|------|------|-------|
| Limited | 0.77 | 0.36 | 1.67 | 0.506 | 1.14 | 0.47 | 2.77 | 0.766 |
|---------|------|------|------|-------|------|------|------|-------|

**Financial difficulty with healthcare (vs not difficult or n/a)**

|                 |      |      |      |       |      |      |      |       |
|-----------------|------|------|------|-------|------|------|------|-------|
| Some difficulty | 0.61 | 0.19 | 1.93 | 0.402 | 0.99 | 0.27 | 3.57 | 0.988 |
|-----------------|------|------|------|-------|------|------|------|-------|

**Travel time to hospital (<= 1 hour)**

|         |      |      |      |       |      |      |      |       |
|---------|------|------|------|-------|------|------|------|-------|
| >1 hour | 0.70 | 0.22 | 2.24 | 0.551 | 0.62 | 0.14 | 2.81 | 0.533 |
|---------|------|------|------|-------|------|------|------|-------|

**Travel time to GP (<=10 minutes)**

|             |      |      |      |       |      |      |      |       |
|-------------|------|------|------|-------|------|------|------|-------|
| >10 minutes | 1.00 | 0.61 | 1.66 | 0.850 | 0.62 | 0.32 | 1.19 | 0.149 |
|-------------|------|------|------|-------|------|------|------|-------|

**Number of outpatient appointments in last 6 months (vs 0-2)**

|    |      |      |      |       |      |      |      |       |
|----|------|------|------|-------|------|------|------|-------|
| ≥3 | 0.64 | 0.32 | 1.30 | 0.215 | 1.21 | 0.54 | 2.71 | 0.644 |
|----|------|------|------|-------|------|------|------|-------|

**Number of GP appointments in last 6 months (vs 0-2)**

|    |      |      |      |       |      |      |      |       |
|----|------|------|------|-------|------|------|------|-------|
| ≥3 | 0.84 | 0.48 | 1.47 | 0.549 | 1.66 | 0.87 | 3.17 | 0.126 |
|----|------|------|------|-------|------|------|------|-------|

**Baseline MTBQ category (vs no burden)**

|     |      |      |      |       |      |      |      |       |
|-----|------|------|------|-------|------|------|------|-------|
| Low | 0.71 | 0.39 | 1.29 | 0.260 | 0.89 | 0.38 | 2.08 | 0.786 |
|-----|------|------|------|-------|------|------|------|-------|

|        |      |      |      |              |      |      |      |       |
|--------|------|------|------|--------------|------|------|------|-------|
| Medium | 0.37 | 0.19 | 0.71 | <b>0.003</b> | 1.20 | 0.52 | 2.75 | 0.666 |
|--------|------|------|------|--------------|------|------|------|-------|

|      |           |  |  |  |  |  |  |  |
|------|-----------|--|--|--|--|--|--|--|
| High | (omitted) |  |  |  |  |  |  |  |
|------|-----------|--|--|--|--|--|--|--|

---



**Table S4 - Comparison of aspects of the longitudinal treatment burden study by Eton et al. \* and this study**

|                                                                 | <b>Dorset follow up survey</b>                                                                                                                                                                                                                                                                                       | <b>Eton longitudinal study*</b>                                                                                                                                                                                                                                                                                                                                          |
|-----------------------------------------------------------------|----------------------------------------------------------------------------------------------------------------------------------------------------------------------------------------------------------------------------------------------------------------------------------------------------------------------|--------------------------------------------------------------------------------------------------------------------------------------------------------------------------------------------------------------------------------------------------------------------------------------------------------------------------------------------------------------------------|
| <b>Population</b>                                               | <p>300 people with three or more multiple long term conditions (LTCs) of a total potential 525 followed up from the baseline survey.</p> <p>All aged 55 or over.</p> <p>Median age 77</p>                                                                                                                            | <p>396 adults with multiple LTCs from a random sample of 1496 people with MLTC age 20 and above.</p> <p>Median age 63</p>                                                                                                                                                                                                                                                |
| <b>How multimorbidity defined</b>                               | <p>Three or more from a list of 19 LTCs selected as common, readily identified from coding in GP records, and representing a range of body systems</p>                                                                                                                                                               | <p>Two or more of 27 chronic conditions (including conditions identified as national public health priorities) identified from International Classification of Disease (ICD) diagnostic coding by a health care provider</p>                                                                                                                                             |
| <b>Treatment burden measure</b>                                 | <p>Multimorbidity Treatment Burden Questionnaire (MTBQ)</p>                                                                                                                                                                                                                                                          | <p>Patient Experience with Treatment and Self-management (PETS)</p>                                                                                                                                                                                                                                                                                                      |
| <b>Timeframe</b>                                                | <p>Two time points:</p> <p>Baseline: 2019</p> <p>Follow up: 2021</p>                                                                                                                                                                                                                                                 | <p>Four time points:</p> <p>Baseline ?2015/16</p> <p>6 months</p> <p>12 months</p> <p>24 months</p>                                                                                                                                                                                                                                                                      |
| <b>Outcomes</b>                                                 | <p>Increasing treatment burden defined as increase in MTBQ global score (0-100).</p> <p>Treatment burden also categorised to none (global score of 0), low (&gt;0 and &lt;10), medium (≥10 and &lt;22), or high (≥22).</p>                                                                                           | <p>Trajectories of treatment burden by 'workload' and 'impact' metrics developed by latent class growth mixture modelling.</p> <p>High treatment burden impact.</p> <p>Increasing treatment burden.</p>                                                                                                                                                                  |
| <b>Independent associations with increased treatment burden</b> | <p><b>With increase in MTBQ global score:</b></p> <ul style="list-style-type: none"> <li>• Having more than five LTCs</li> <li>• Living more than 10 minutes from the GP</li> </ul> <p>No statistically significant association observed with changes in treatment burden category (either increase or decrease)</p> | <p><b>Consistently high workload:</b></p> <ul style="list-style-type: none"> <li>• Lower health literacy</li> <li>• Lower self-efficacy</li> <li>• Higher interpersonal challenges with others</li> </ul> <p><b>Increasing impact:</b></p> <ul style="list-style-type: none"> <li>• More physically unhealthy days</li> <li>• Higher interpersonal challenges</li> </ul> |

|                |                                       |                                                                                                                                                                                                                                     |
|----------------|---------------------------------------|-------------------------------------------------------------------------------------------------------------------------------------------------------------------------------------------------------------------------------------|
|                |                                       | <p>with others</p> <p><b>Consistently high impact:</b></p> <ul style="list-style-type: none"> <li>• More mentally unhealthy days</li> <li>• Lower health literacy</li> <li>• Higher interpersonal challenges with others</li> </ul> |
| <b>Setting</b> | Primary Care practices in Dorset Engl | Southeastern Minnesota, USA                                                                                                                                                                                                         |

\* Summarised from Ref 35: Eton DT, Anderson RT, St. Sauver JL, Rogers EA, Linzer M, Lee M. Longitudinal trajectories of treatment burden: A prospective survey study of adults living with multiple chronic conditions in the midwestern United States. *Journal of Multimorbidity and Comorbidity* 2022;12:1-14. doi:10.1177/26335565221081291
